1 Yara Nouredine<sup>1</sup>, Martine da Rocha<sup>1</sup>, Sébastien Thomine<sup>2</sup>, Michaël Quentin<sup>1</sup>, Pierre Abad<sup>1</sup>,  
2 Bruno Favery<sup>1</sup>, and Stéphanie Jaubert-Possamai<sup>1\*</sup>

3 1 INRAE, Université Côte d'Azur, CNRS, ISA, Sophia Antipolis, F-06903, France

4 2 Institute for Integrative Biology of the Cell (I2BC), UMR9198 CNRS/CEA/Univ. Paris Sud,  
5 Université Paris-Saclay, Gif-sur-Yvette, France.

6 Corresponding author: [stephanie.jaubert@inrae.fr](mailto:stephanie.jaubert@inrae.fr)

7

8 **Copper microRNAs govern the formation of giant feeding cells induced by the root knot**  
9 **nematode *Meloidogyne incognita* in *Arabidopsis thaliana***

10

11 **Short title:** Copper miRNAs in plant-nematode interactions

12

13 The author responsible for distribution of materials integral to the findings presented in this  
14 article in accordance with the policy described in the Instructions for Authors  
15 (<https://academic.oup.com/plcell/pages/General-Instructions>) is : Stéphanie Jaubert-Possamai  
16 ([stephanie.jaubert@inrae.fr](mailto:stephanie.jaubert@inrae.fr))

17

18

19

20

21

22

23

24

25

26

27

28 **Abstract** (169 words)

29 miR408 and miR398 are two conserved microRNAs which expression is activated by the  
30 SPL7 transcription factor in response to copper starvation. We identified these two  
31 microRNAs families as upregulated in *Arabidopsis thaliana* and *Solanum lycopersicum* roots  
32 infected by root-knot nematodes. These endoparasites induce the dedifferentiation of a few  
33 root cells and the reprogramming of their gene expression to generate giant feeding cells. By  
34 combining functional approaches, we deciphered the signaling cascade involving these  
35 microRNAs, their regulator and their targets. *MIR408* expression was located within  
36 nematode-induced feeding cells in which it co-localised with *SPL7* expression and was  
37 regulated by copper. Moreover, infection assays with *mir408* and *spl7* KO mutants or lines  
38 expressing targets rendered resistant to cleavage by miR398 demonstrated the essential role of  
39 the *SPL7/MIR408/MIR398* module in the formation of giant feeding cells. Our findings  
40 reveals how perturbation of plant copper homeostasis, *via* the *SPL7/MIR408/MIR398* module,  
41 governs the formation of nematode-induced feeding cells.

42

43 **Introduction** (1124 words)

44 MicroRNAs are small non-coding RNAs that regulate the expression of protein-coding genes,  
45 mostly at the post-transcriptional level, in plants. They are major post-transcriptional  
46 regulators of gene expression in various biological processes, including plant development (Li  
47 and Zhang, 2016), responses to abiotic stresses (Barciszewska-Pacak et al., 2015), hormone  
48 signalling (Curaba et al., 2014), and responses to pathogens or symbiotic micro-organisms  
49 (Hoang et al., 2020; Weiberg and Jin, 2015). MicroRNAs and short interfering RNAs  
50 (siRNAs) were recently shown to play a key role in plant-pathogen crosstalk through trans-  
51 kingdom RNAi processes (Weiberg et al., 2013; Cai et al., 2018; Dunker et al., 2020).  
52 MicroRNAs are produced by the cleavage of long double-stranded RNA precursors by the  
53 DICER RNase, generating 20-22 nucleotides miRNA duplexes composed of a mature (5P)  
54 and a complementary (3P) strand. One of the two strands is then incorporated into the RNA-  
55 induced silencing complex (RISC) to guide the major RISC protein, ARGONAUTE1  
56 (AGO1), to the targeted messenger RNA (mRNA) on the basis of sequence complementarity.  
57 The hybridization of AGO1-bound miRNAs to their targets induces predominantly targeted  
58 mRNA degradation in plants, but it may also lead to an inhibition of mRNA translation  
59 (Axtell, 2013).

60 The miR408 and miR398 microRNA families are conserved so-called “copper microRNAs”,  
61 due to their involvement in the plant response to copper deficiency (Zhang et al., 2015;  
62 Yamasaki et al., 2007). Copper is an essential nutrient for plants, due to its function as a  
63 cofactor for many proteins. Copper proteins are involved in electron transport chains or  
64 function as enzymes in redox reactions. In plants, copper is involved in respiration,  
65 photosynthesis, ethylene perception, the metabolism of reactive oxygen species and cell wall  
66 remodelling (reviewed in Burkhead et al., 2009). Copper microRNAs accumulate in response  
67 to copper deficiency and their synthesis is repressed when copper concentrations are  
68 sufficiently high (Yamasaki et al., 2009). The underlying mechanism has been described in  
69 *Arabidopsis thaliana*, in which the regulation of *MIR408*, *MIR398B* and *MIR398C* by copper  
70 levels was shown to be mediated by the SQUAMOSA PROMOTER-BINDING PROTEIN-  
71 LIKE7 (SPL7) transcription factor (Yamasaki et al., 2009). The *A. thaliana* genome contains  
72 a single copy of *MIR408*, and three *MIR398* genes: *MIR398A*, *-B* and *-C*. At high copper  
73 concentrations, the DNA-binding activity of the SPL7 transcription factor is repressed,  
74 preventing the induction of transcription for downstream genes, such as *MIR408* or *MIR398B*  
75 and *MIR398C*, but not *MIR398A* (Sommer et al., 2011; Yamasaki et al., 2009). In the  
76 presence of low concentrations of copper, SPL7 activates the expression of copper-responsive  
77 microRNAs that target and repress the expression of genes encoding copper-binding proteins.  
78 These proteins are replaced by proteins that do not bind copper, to save copper resources for  
79 the functions for which this element is essential, such as photosynthesis (reviewed in  
80 Burkhead et al., 2009). For example, the mRNA for the cytosolic COPPER/ZINC (Cu-Zn)  
81 SUPEROXIDE DISMUTASE, CSD1, which can be replaced by an iron (Fe)-dependent SOD,  
82 is targeted by the copper microRNA miR398. In addition to their regulation as a function of  
83 copper levels through the activity of SPL7, *MIR408* and the *MIR398* family are also regulated  
84 by several environmental cues and abiotic stresses, such as light, which regulates *MIR408*  
85 activity through the ELONGATED HYPOCOTYL5 (HY5) or PHYTOCHROME  
86 INTERACTING FACTOR1 (PIF1) transcription factors in *A. thaliana* (Jiang et al., 2021),  
87 and salinity, oxidative and cold stresses, which have been shown to induce miR408 in *A.*  
88 *thaliana* (Ma et al., 2015), or cadmium treatment in *Brassica napus* (Fu et al., 2019). The  
89 miR408 and miR398 families have been widely analysed in plant responses to abiotic  
90 stresses, but little is known of their role in plant responses to biotic stresses. In sweet potato,  
91 *MIR408* has been associated with plant defences, as it is repressed by jasmonic acid (JA) and  
92 wounding, and miR408-overexpressing plants have attenuated resistance to insect feeding

93 (Kuo et al., 2019). Moreover, miR398 has been shown to regulate cell death in response to the  
94 causal agent of barley powdery mildew, *Blumeria graminis* (Xu et al., 2014).

95 Root-knot nematodes (RKN) of the genus *Meloidogyne* are obligatory sedentary plant  
96 parasites capable of infesting more than 5,000 plant species (Abad and Williamson, 2010;  
97 Blok et al., 2008). The RKN larvae penetrate the roots, in which they induce the de-  
98 differentiation of five to seven parenchyma root cells and their reprogramming into the  
99 multinucleate, hypertrophied feeding cells that form the feeding site. These metabolically  
100 overactive feeding cells provide the nutrients required for RKN development (Favery et al.,  
101 2020). During the dedifferentiation of vascular cells and their conversion into ‘giant’ feeding  
102 cells, the cells surrounding the feeding site begin to divide again. The growth of the feeding  
103 cells and the division of the surrounding cells lead to a root swelling known as a gall. The  
104 feeding cell induction occurs in the first three days after root infection. Feeding cell formation  
105 can be split into two phases. Firstly, the cells undergo successive nuclear divisions coupled  
106 with cell expansion until ten days post infection (dpi) in *A. thaliana* (Caillaud *et al.*, 2008). In  
107 the second phase, from 10 to 21 dpi, the successive nuclear divisions stop and the nuclei of  
108 the feeding cells undergo extensive endoreduplication (Wiggers et al., 1990; de Almeida  
109 Engler and Gheysen, 2013). The dedifferentiation of vascular cells and their conversion into  
110 giant cells result from an extensive reprogramming of gene expression in root cells, in  
111 response to RKN signals. In *A. thaliana*, the expression of approximately 10% of protein-  
112 coding genes is modified in galls induced by RKN (Cabrera et al., 2014; Yamaguchi et al.,  
113 2017; Jammes et al., 2005; reviewed in Escobar et al., 2011). The sequencing of small RNAs  
114 identified 24 mature microRNAs differentially expressed between *A. thaliana* galls induced  
115 by *M. incognita* and uninfected roots at 7 and 14 dpi (Medina et al., 2017). The miR408 and  
116 miR398 families of copper-responsive microRNAs were found to be upregulated in galls at 7  
117 and/or 14 dpi.

118 In this article, we showed a conserved upregulation of these two microRNA families in  
119 *Arabidopsis* and tomato galls. Moreover, we found that the upregulation of miR408 in  
120 response to nematode was required for successful infection. Our findings highlighted a strong  
121 activity of *MIR408* promoter (*pMIR408*) in early galls that is i) driven by the modulation of  
122 environmental copper levels, ii) colocalised with strong *SPL7* expression. Moreover, we also  
123 demonstrated the involvement of this transcription factor in giant cell formation. In addition,  
124 we showed that the silencing of *CSD1* and *BLUE COPPER BINDING PROTEIN (BCBP)*  
125 transcripts by miR398 is involved in gall development. Finally, the watering of *Arabidopsis*



126 with copper sulphate solutions at concentrations below the toxicity thresholds for nematode  
127 and plant development greatly decreased the RKN infection and impaired feeding cell  
128 development.

129

## 130 **Results**

### 131 **The copper microRNA miR408 is crucial for the *Arabidopsis-Meloidogyne* interaction**

132 Our previous analysis of microRNAs expressed in *Arabidopsis* galls induced by *M. incognita*  
133 revealed an upregulation of mature miR408 in *Arabidopsis* galls at 7 and 14 dpi, whereas  
134 miR398b/c was specifically upregulated in galls at 14 dpi. Sequencing of small RNAs from  
135 uninfected roots and galls of *Solanum lycopersicum* showed that these two microRNA  
136 families were also upregulated in tomato galls at 7 and 14 dpi (Table 1 and supplemental  
137 Table S1). Therefore, these microRNAs are among the very few conserved microRNAs which  
138 expression profile is conserved in *Arabidopsis* and tomato galls. We investigated the role of  
139 miR408 in gall development using two previously described *Arabidopsis* KO mutant lines:  
140 *miR408-1* and *miR408-2* (Maunoury and Vaucheret, 2011). The KO lines and corresponding  
141 wild-type plants were inoculated with *M. incognita* second stage juveniles (J2s) and their  
142 susceptibility was quantified by counting the galls and egg masses produced by adult females  
143 at the root surface. The two KO lines for *MIR408* had 40 to 50% fewer galls and egg masses  
144 than the wild type ( $p < 0.05$ ; Figure 1 and Supplemental Data Set S1). The roots of these KO  
145 lines were of similar weight and global architecture to those of wild-type plants  
146 (Supplemental Figure S1 and Supplemental Data Set S1). We then investigated the effect of  
147 the *MIR408* mutation on feeding site development, by comparing the area of feeding cells  
148 within galls collected from KO and wild-type plants (Figure 1A-C and Supplemental Data Set  
149 S1). Both KO mutants had a significantly smaller feeding site area than the wild type. Overall,  
150 these results demonstrate that *MIR408* is involved in feeding cell development in the  
151 *Arabidopsis*-nematode interaction, and that the lower susceptibility of the *miR408* KO lines is  
152 due to defects of feeding site formation.

153 We investigated the mechanisms by which miR408 regulates feeding cell formation in galls,  
154 by identifying the targets of miR408. The psRNA target algorithm (Dai et al., 2018) predicted  
155 101 genes as putative targets of miR408 in *Arabidopsis* (Supplemental Data Set S2A). The  
156 expression profiles of these genes in galls at 7 dpi and 14 dpi were obtained from previous  
157 transcriptome analyses (Jammes *et al.* 2005). Only seven of the 101 putative targets were

158 differentially expressed in galls at 7 and/or 14 dpi, and only two putative targets were  
159 repressed: a gene encoding a copper-binding protein, UCLACYANIN2 (*UCC2*, *At2g44790*),  
160 which is known to be cleaved by miR408 in senescing leaves and siliques (Thatcher et al.,  
161 2015), and a gene encoding a PHOSPHATASE 2G (*PP2CG1*, *At2g33700*) (Supplemental  
162 Data Set S2B).

### 163 ***MIR408* induction in galls is driven by modulation of copper level**

164 We investigated the induction of *MIR408* in response to nematode infection, by inoculating  
165 plants expressing p*MIR408*::GUS with *M. incognita* J2s (Zhang and Li, 2013) *in vitro* in the  
166 presence of normal copper levels (0.1  $\mu$ M CuSO<sub>4</sub>) or with a high copper concentration  
167 (Gamborg B5 plus 5  $\mu$ M CuSO<sub>4</sub>). In the presence of normal concentrations of copper, we  
168 observed a strong GUS signal in developing galls at 3 and 7 dpi (Figure 2A-B). This signal  
169 had decreased in intensity by 14 dpi (Figure 2C) and disappeared completely from fully  
170 developed galls at 21 and 28 dpi (Supplemental Figure S2). On gall sections, the GUS signal  
171 was localised in the giant feeding cells and neighbouring cells, at the 3 dpi, 7 dpi and 14 dpi  
172 time points (Figure 2D-F). By contrast, in plants grown in the presence of high copper  
173 concentrations, the GUS signal was much weaker in galls at 3 and 7 dpi (Figure 2G-H), and  
174 undetectable in galls at 14 dpi (Figure 2I). The repression of *MIR408* expression in galls by  
175 high copper concentrations indicates that *MIR408* expression within *Arabidopsis* galls is  
176 regulated by modulation of copper levels.

### 177 ***SPL7* is an activator of *MIR408* transcription in galls**

178 The regulation of *MIR408* by modulation of copper levels has been shown to be mediated by  
179 the *SPL7* transcription factor (Zhang et al., 2014; Bernal et al., 2012). Transcriptome analyses  
180 from *Arabidopsis* galls showed that *SPL7* was expressed in galls at 7, 14 and 21 dpi (Jammes  
181 et al., 2005). We further investigated the expression of *SPL7* within galls, by inoculating a  
182 *pSPL7*::GUS *Arabidopsis* line (Araki et al., 2018) with *M. incognita* in the presence of a  
183 normal copper concentration. *SPL7* promoter activity was observed within the gall from 3 to  
184 14 dpi, with lower levels at 14 dpi (Figure 3A-C). As observed for p*MIR408*::GUS, sections  
185 of *pSPL7*::GUS galls revealed a GUS signal in the giant feeding cells and neighbouring cells  
186 (Figure 3D). We investigated the putative function of *SPL7* in plant responses to RKN, by  
187 inoculating the *Arabidopsis spl7* KO mutant described by Zhang *et al.* (2014) with *M.*  
188 *incognita* J2s. *SPL7* knockout led to the production of smaller numbers of galls and egg  
189 masses per plant than were observed for the wild-type (Figure 3E-F and Supplemental Data

190 Set S3). This knockout had no effect on root weight (Supplemental Figure S3 and  
191 Supplemental Data Set S3). Measurements of the area of the feeding site within galls revealed  
192 defects of feeding site formation in the *spl7* KO mutants, resulting in smaller giant cells than  
193 were observed in wild-type plants (Figure 3G and Supplemental Data Set S3). Overall, these  
194 results demonstrate the requirement of miR408 and *SPL7* for the development of giant cells.  
195 The upregulation of mature miR408 observed in galls suggest an induction of *MIR408*  
196 expression driven by *SPL7* due to a decrease in copper availability within the gall.

### 197 **micro398, a second copper-responsive microRNA family involved in the *Arabidopsis*-** 198 ***Meloidogyne* interaction**

199 MiR408 is not the only copper-responsive microRNA differentially expressed in galls. The  
200 expression of *MIR398B* and *MIR398C*, from the conserved miR398 family, has also been  
201 shown to be induced in response to copper deficiency, via *SPL7* activity (Araki et al., 2018).  
202 We previously described an induction of the mature miR398b and miR398c in *Arabidopsis*  
203 galls at 14 dpi (Medina et al., 2017). Three targets of the miR398 family have been  
204 biologically validated: the *At1g08830* and *At2g28190* transcripts encoding two copper  
205 superoxide dismutases, *CSD1* and *CSD2*, respectively, and the *At5g20230* transcript encoding  
206 the blue copper binding protein (BCBP), identified as a non-canonical target of miR398  
207 (Brousse et al., 2014). We investigated the role of miR398 further, by infecting *Arabidopsis*  
208 lines expressing modified versions of *CSD1* (*mcsdl*) or *BCBP* (*mbcbp*) mRNAs rendered  
209 resistant to cleavage by miR398 (Brousse et al., 2014; Beauclair et al., 2010). The target  
210 mRNA levels is therefore artificially increased in these plants. The prevention of *CSD1*  
211 transcript cleavage by miR398 had no effect on root weight (Figure S4), but led to lower  
212 levels of nematode infection, with the mutant having less galls and egg masses than the wild  
213 type (Figure 4 and Supplemental Data Set S4). The *mbcbp* line also had fewer egg masses  
214 than the wild-type (Figure 4 and Supplemental Data Set S4). No defect of feeding cell  
215 formation, such as slower feeding cell growth, was observed in either of these lines (Figure 4  
216 and Supplemental Data Set S4). The specific decrease in egg mass production by females  
217 provides evidence for a role for miR398 in the functionality of feeding cells, although the  
218 mutations in the *mcsdl* and *mbcbp* lines did not affect feeding site size. These findings  
219 demonstrate that the cleavage of *CSD1* and *BCBP* transcripts by miR398 is required for plant-  
220 RKN interaction.

### 221 **Modulation of copper levels is essential for plant-RKN interaction**

222 To study further the effect of copper on nematode infection, we analysed the direct effects of  
223 copper on nematode survival and gall development. Free-living *M. incognita* J2s were  
224 incubated in several concentrations of copper sulphate (50  $\mu$ M to 2 mM) used in previous  
225 studies assessing the effect of copper on plant development (Schulten et al., 2019). As a  
226 negative control, J2s were incubated in tap water. Living J2 counts after 24 hours in the  
227 copper sulphate solution showed that copper was non-toxic at a concentration of 50  $\mu$ M  
228 (Supplemental Figure S5 and Supplemental Data Set S5). By contrast, toxic effects were  
229 observed for all other concentrations tested (0.5 mM, 1 mM and 2 mM). We then analysed the  
230 effect of copper on gall formation in Col0 and *pMIR408::GUS* plants grown in soil watered  
231 with 50  $\mu$ M CuSO<sub>4</sub>. We also minimised J2 exposure to copper in the soil, by beginning to  
232 water plants 50  $\mu$ M CuSO<sub>4</sub> two days after inoculation, after the J2s had already penetrated the  
233 roots. Watering with 50  $\mu$ M CuSO<sub>4</sub> repressed pMIR408 activity, confirming the effects of  
234 such treatment in galls (Supplemental Figure S6 and Supplemental Data Set S6). Watering  
235 with 50  $\mu$ M CuSO<sub>4</sub> had no visible effect on root weight and architecture (Supplemental  
236 Figure S7 and Supplemental Data Set S7), but it resulted in a strong and significant decrease  
237 in the number of galls and egg masses relative to control plants watered with tap water  
238 (Figure 5). These results demonstrate that perturbation of plant copper homeostasis governs  
239 the formation plant-RKN interaction.

240

## 241 **Discussion**

242 RKN induce the formation of similar giant feeding cells in thousands of plant species. The  
243 conservation of the ontogeny and phenotype of nematode-induced feeding cells between  
244 species, strongly suggests that the plant molecular mechanisms manipulated by RKN are  
245 widely conserved across the plant kingdom. Previous transcriptome analyses on various plant  
246 species have shown that the development of galls in roots infected by RKN is associated with  
247 a massive reprogramming of gene expression (reviewed in Escobar et al., 2011). MicroRNAs  
248 are small non-coding RNAs that regulate gene expression at the post-transcriptional level, and  
249 some microRNA families, such as the miR156 and miR167 families, are widely conserved in  
250 plants (Chavez Montes Nature Communications 2014). The role for microRNAs in  
251 controlling gene expression during the formation of galls was recently reported in *Arabidopsis*  
252 (reviewed in Jaubert-Possamai et al., 2019), for the conserved microRNAs miR390, miR172  
253 and miR159 (Escobar et al., 2015; Medina et al., 2017).

254 **miR408 and miR398: two copper-responsive microRNA families activated in**  
255 ***Arabidopsis* galls induced by *M. incognita***

256 A previous analysis of the levels of mature microRNAs in galls at 7 and or 14 dpi and in  
257 uninfected roots showed that mature mi408 and mir398b/c were induced in galls in response  
258 to *M. incognita* (Medina et al., 2017). A combination of *in silico* predictions of the transcripts  
259 targeted by miR408 and previous transcriptional analyses of galls and uninfected roots  
260 identified two putative targets downregulated in galls the genes the *UCLACYANIN-2* (*UCC2*)  
261 and the *PHOSPHATASE* (*PP2CG*). The cleavage of *UCC2* transcripts by miR408 has been  
262 biologically validated in *Arabidopsis* and rice (Thatcher et al., 2015; Zhang et al., 2017).  
263 Moreover, several targets of miR398 have been biologically validated, including the cytosolic  
264 *CSD1* and chloroplastic *CSD2*, and the non-canonical target *BCBP* (Beauclair et al., 2010;  
265 Brousse et al., 2014). Our analysis, thus, identified several biologically validated and  
266 conserved targets that may be considered robust candidates for mediating the functions of  
267 miR398b/c and miR408 in galls.

268 The inactivation of miR408 in T-DNA mutant lines, or of miR398b/c function in transgenic  
269 plants expressing mutated *CSD1* or *BCBP* resistant to miR398 cleavage, led to decreases in  
270 both the parameters used to assess parasitic success (the number of galls and the number of  
271 egg masses per root). The smaller number of galls in the mutant lines demonstrates the  
272 involvement of the miR398 family and miR408 in the early plant response to RKN.  
273 Moreover, the smaller feeding sites observed in the two *miR408* KO lines and the *spl7* mutant  
274 demonstrate that this miR408 and *SPL7* are involved in the formation of the giant cells, which  
275 are essential for nematode growth and development. Females are unable to develop normally  
276 if the feeding cells are too small, as already reported in some *Arabidopsis* mutants, such as  
277 lines with a knockout of *PHYTOSULFOKINE RECEPTOR1* (*PSKR1*) (Rodiuc et al., 2016).  
278 Only a few genes and plant functions have been demonstrated to be essential for the formation  
279 of giant feeding cells (Favery *et al.*, 2020). In the absence of changes in giant cell size in the  
280 *mcsd1* and *mbcbp* mutants, we hypothesise that the miR398-regulated *CSD1* and *BCBP* genes  
281 may play a role in giant cell functioning, potentially in reactive oxygen species (ROS)-related  
282 redox regulation and signalling (Zhao et al., 2020). Further studies will be required to  
283 determine their precise roles in the plant-RKN interaction.

284 ***SPL7* is a regulator of miR408 and miR398 in galls**

285 In *A. thaliana*, it has been shown that *MIR408*, *MIR398B* and *MIR398C* are activated by the  
286 same transcription factor, *SPL7*, the activity of which is dependent on copper levels  
287 (Yamasaki et al., 2009; Araki et al., 2018). We confirmed the activity of the *SPL7* promoter  
288 and *MIR408* in feeding cells and neighbouring cells. The co-expression of *SPL7* and *MIR408*  
289 within developing galls, and the similar nematode infection phenotype, with feeding site  
290 formation defects, strongly suggest that *SPL7* is responsible for activating *MIR408*  
291 transcription in galls, as already reported in leaves and the root vasculature (Yamasaki et al.,  
292 2009; Araki et al., 2018). We therefore hypothesised that the expression of *MIR408* and  
293 *MIR398B* and *-C* is activated by the *SPL7* transcription factor in response to a decrease in  
294 copper concentration within galls. Other transcription factors, such as *HY5* and *PIF1*, which  
295 are known to regulate the expression of *MIR408* in response to light stress (Zhang et al., 2014;  
296 Jiang et al., 2021), are expressed in galls and could also play a role in the regulation of  
297 *MIR408* expression. However, the strong repression of *MIR408* by excess copper observed in  
298 galls suggests that *MIR408* upregulation in galls is predominantly driven by copper and *SPL7*.

299

### 300 **Modulation of copper levels, a key conserved factor for gall formation**

301 Infection assays with *A. thaliana* plants watered with a copper sulphate solution at a  
302 concentration non-toxic for plants and nematodes, showed a strong decreased RKN infection  
303 rates and resulted in defective feeding site formation. Together with the upregulation in galls  
304 of two microRNA families known to be induced by copper deficiency, the miR408 and  
305 miR398 families, and the regulation of *MIR408* expression by copper, this finding suggests  
306 that copper content decreases in the galls induced by RKN infection. This hypothesis is  
307 supported by the downregulation of the *COPT2* gene, encoding a copper importer, in the  
308 *Arabidopsis* gall transcriptome (Jammes et al., 2005). Assays in RKN-infected susceptible  
309 tomato roots have also demonstrated a decrease in copper concentration (Lobna et al., 2017).

310 The *SPL7/MIR408-UCC2/MIR398-CSD1* copper signalling cascade may be a key factor in  
311 gall formation, conserved across the plant kingdom. MiR408 and miR398 have been  
312 identified in more than 40 plant species (Griffiths-Jones et al., 2007) and *SPL7* is widely  
313 conserved throughout the plant kingdom (Yamasaki et al., 2009). Moreover, the targeting of  
314 *UCLACYANIN* by miR408 and of *CSD1* by miR398 is conserved in both dicotyledonous and  
315 monocotyledonous plants (Zhang et al., 2017; Thatcher et al., 2015). A role for  
316 *UCLACYANINS* in the formation of a lignified nanodomain within the Casparian strips



317 known to form an endodermal barrier in *Arabidopsis* roots has recently been described (Reyt  
318 et al., 2020). Casparian strip defects have been observed in the endodermis bordering the giant  
319 cell area within sorghum galls induced by *M. naasi* (Ediz and Dickerson, 1976). Moreover,  
320 *Arabidopsis* mutants with disrupted Casparian strips are particularly susceptible to RKN  
321 (Holbein et al., 2019). The infection of plants with nematodes may, therefore, provides a  
322 unique model for investigating the role of copper modulation, *via* miR408 and its  
323 *UCLACYANIN2* target, in the formation of Casparian strips.

324

## 325 **Methods**

### 326 **Biological material, growth conditions and nematode inoculation**

327 Seeds of *A. thaliana* Col0 and mutants *miR408-1*(SALK\_038860), *miR408-2*  
328 (SALK\_121013.28.25.n), *spl7* (SALK\_093849), *mcsd1* and *mbcbp* (Beauclair et al., 2010),  
329 *pmiR408::GUS* (Zhang et al., 2013) and *pSPL7::GUS* (Yamasaki et al., 2009) were surface-  
330 sterilised and sown on Gamborg B5 medium agar plates (0.5 x Gamborg, 1% sucrose, 0.8%  
331 agar, pH 6.4). The plates were incubated at 4°C for two days, then transferred to a growth  
332 chamber (20°C with an 8 h light/ 16 h darkness cycle). *M. incognita* strain “Morelos” was  
333 multiplied on tomato plants in a growth chamber (25°C, 16 h light/8 h darkness). For the  
334 RKN infection of plants in soil, two-week-old plantlets grown *in vitro* were transferred to a  
335 mixture of 50% sand (Biot B5)/50% soil in a growth chamber (21°C, 8 h light/16 h darkness).  
336 For studies of the effect of copper on gall development on plants *in vitro*, *Arabidopsis*  
337 plantlets were sown and cultured *in vitro*, as described above, on Gamborg B5 medium  
338 supplemented with 50 µM CuSO<sub>4</sub>.

339

### 340 **Root knot nematode infection assay**

341 For nematode infections *in vitro*, J2s were surface-sterilised with HgCl<sub>2</sub> (0.01 %) and  
342 streptomycin (0.7 %), as described by Caillaud and Favery (2016). We inoculated each 25-  
343 day-old seedlings grown individually *in vitro* with 200 sterilised J2s resuspended in Phytigel  
344 (5 %). Infection assays were performed on *Arabidopsis* mutants and a wild-type ecotype in  
345 soil. We inoculated 20 to 30 two-month-old plantlets with 150 J2s per plant and incubated  
346 them in a growth chamber (21°C, 8 h light/16 h darkness). Seven weeks after infection, the  
347 roots were collected, washed in tap water and stained with eosin (0.5 %). Stained roots were



348 weighed and galls and egg masses were counted on each root under a binocular microscope.  
349 Mann and Whitney tests (2.5 %) were performed to determine the significance of the  
350 observed differences in the numbers of egg masses and galls per root.

351

352

353

### 354 **Small RNA sequencing from galls and uninfected tomato roots**

355 Biological material, RNA extraction, small RNA sequencing, read mapping and statistical  
356 analysis are presented as supplemental material.

357

### 358 **BABB clearing**

359 Feeding site development was evaluated by the BABB clearing method described by Cabrera  
360 et al., (2018). Briefly, the area occupied by the giant cells was measured on galls collected 14  
361 dpi, cleared in benzyl alcohol/benzyl benzoate (BABB) and examined under an inverted  
362 confocal microscope (model LSM 880; Zeiss). Zeiss ZEN software was used to measure the  
363 area occupied by the giant cells in each gall, on two biological replicates. Data were analysed  
364 in Mann and Whitney tests.

365

### 366 **Copper treatment**

367 *M. incognita* eggs were collected as previously described (Caillaud and Favery, 2016) and  
368 placed on a 10 µm-mesh sieve for hatching in tap water. Free-living J2s were collected from  
369 the water with a 0.5 µm-mesh sieve. We evaluated the toxicity of copper to J2s by incubating  
370 freshly hatched J2s in solutions of copper sulphate of various concentrations for 24 hours. The  
371 numbers of living or dead J2s were then determined by counting under a binocular  
372 microscope. We investigated the effects of copper on plant-nematode interactions in  
373 *Arabidopsis* Col0 grown in soil. *Arabidopsis* Col0 plantlets were prepared and inoculated as  
374 previously described for in-soil infection. Half the plants were watered with 50 µM CuSO<sub>4</sub>  
375 two days after inoculation with J2s and then once per week for the next seven weeks. Control  
376 Col0 plants were watered with tap water in place of copper sulphate solution, at the same  
377 frequency. Seven weeks after inoculation, the plants were collected, their roots were washed

378 and weighed, and the numbers of galls and egg masses on the roots were counted, as  
379 described above.

380

### 381 **Studies of promoter-GUS fusion gene expression**

382 We localised the promoter activity of *MIR408* and *SPL7* in *A. thaliana* lines expressing  
383 various fusions of the GUS reporter gene to promoters from these genes (ref & Supplemental  
384 Table S7). We inoculated 21-day-old seedlings in soil and *in vitro*, as described above. We  
385 collected inoculated roots and washed them in water, 3, 7, 14 and 21 dpi. GUS staining was  
386 performed as previously described (Favery *et al.*, 1998), and the roots were observed under a  
387 Zeiss Axioplan 2 microscope. Stained galls were dissected, fixed by incubation in 1%  
388 glutaraldehyde and 4% formaldehyde in 50 mM sodium phosphate buffer pH 7.2, dehydrated,  
389 and embedded in Technovit 7100 (Heraeus Kulzer, Wehrheim, Germany), according to the  
390 manufacturer's instructions. Sections were cut and mounted in DPX (VWR International Ltd,  
391 Poole, UK), and observed under a Zeiss Axioplan 2 microscope (Zeiss, Jena, Germany).

392

### 393 **Bioinformatic analysis**

394 We used psRNA target with default parameters for the prediction of miR408 targets (Dai,  
395 Zhuang and Zhao 2018).

### 396 **Author contributions**

397 Y.N., B.F and S.J.P. designed the study and performed the experimental work. All authors  
398 analysed and discussed the data. S.J.P and B.F. designed the study and wrote the manuscript.  
399 M.Q. and P.A. participated in the writing of the manuscript. S.T. participated in the copper  
400 studies. MdR analysed NGS data. The author responsible for distributing materials integral to  
401 the findings presented in this article, in accordance with the policy of the journal  
402 (<https://academic.oup.com/plcell>) is: Stephanie Jaubert Possamai  
403 ([Stephanie.jaubert@inrae.fr](mailto:Stephanie.jaubert@inrae.fr)).

404

### 405 **Acknowledgements**

406 We would like to thank Dr. Nicolas Bouché (INRAE Versailles, France) for helpful  
407 discussions and for providing the *mbcbp* and *mcsd1 Arabidopsis* lines. We would like to  
408 thank Dr. Lei Li (Beijing University, China) for providing the *pMIR408:GUS Arabidopsis*  
409 line. We would also like to thank Dr. Toshiharu Shikanai (Kyoto University, Japan) for  
410 providing the *pSPL7:GUS* and *ko spl7 Arabidopsis* line. The microscopy work was performed  
411 at the SPIBOC imaging facility of Institut Sophia Agrobiotech. We thank Dr Olivier Pierre  
412 and the entire team of the platform for assistance with microscopy. This work was funded by  
413 the INRA SPE department and the French Government (National Research Agency, ANR)  
414 through the ‘Investments for the Future’ LabEx SIGNALIFE: programme reference #ANR-  
415 11-LABX-0028-01 and IDEX UCAJedi ANR-15-IDEX-0, and by the French-Japanese  
416 bilateral collaboration programme PHC SAKURA 2019 #43006VJ. Y.N. was supported by a  
417 doctoral fellowship from Lebanon (Municipal Council of Aazzée).

418

#### 419 **References:**

- 420 Abad, P. and Williamson, V.M. (2010). Plant Nematode Interaction: A Sophisticated  
421 Dialogue. *Adv. Bot. Res.* 53: 147–192.
- 422 de Almeida Engler, J. and Gheysen, G. (2013). Nematode-induced endoreduplication in plant  
423 host cells: why and how? *Mol. Plant-Microbe Interact.* 26: 17–24.
- 424 Araki, R., Mermoud, M., Yamasaki, H., Kamiya, T., Fujiwara, T., and Shikanai, T. (2018).  
425 SPL7 locally regulates copper-homeostasis-related genes in *Arabidopsis*. *J. Plant*  
426 *Physiol.* 224–225: 137–143.
- 427 Axtell, M.J. (2013). Classification and Comparison of Small RNAs from Plants. *Annu. Rev.*  
428 *Plant Biol.* 64: 137–159.
- 429 Barciszewska-Pacak, M., Milanowska, K., Knop, K., Bielewicz, D., Nuc, P., Plewka, P.,  
430 Pacak, A.M., Vazquez, F., Karlowski, W., Jarmolowski, A., and Szweykowska-  
431 Kulinska, Z. (2015). *Arabidopsis* microRNA expression regulation in a wide range of  
432 abiotic stress responses. *Front. Plant Sci.* 6: 410.
- 433 Beauclair, L., Yu, A., and Bouché, N. (2010). MicroRNA-directed cleavage and translational  
434 repression of the copper chaperone for superoxide dismutase mRNA in *Arabidopsis*.  
435 *Plant J.* 62: 454–462.

- 436 Bernal, M., Casero, D., Singh, V., Wilson, G.T., Grande, A., Yang, H., Dodani, S.C.,  
437 Pellegrini, M., Huijser, P., Connolly, E.L., Merchant, S.S., and Krämer, U. (2012).  
438 Transcriptome sequencing identifies SPL7-regulated copper acquisition genes  
439 FRO4/FRO5 and the copper dependence of iron homeostasis in Arabidopsis. *Plant Cell*  
440 24: 738–761.
- 441 Blok, V.C., Jones, J.T., Phillips, M.S., and Trudgill, D.L. (2008). Parasitism genes and host  
442 range disparities in biotrophic nematodes : the conundrum of polyphagy versus  
443 specialisation. *BioEssays* 30: 249–259.
- 444 Brousse, C., Liu, Q., Beauclair, L., Deremetz, A., Axtell, M.J., and Bouché, N. (2014). A non-  
445 canonical plant microRNA target site. *Nucleic Acids Res.* 42: 5270–5279.
- 446 Burkhead, J.L., Gogolin Reynolds, K.A., Abdel-Ghany, S.E., Cohu, C.M., and Pilon, M.  
447 (2009). Copper homeostasis. *New Phytol.* 182: 799–816.
- 448 Cabrera, J., Bustos, R., Favery, B., Fenoll, C., and Escobar, C. (2014). NEMATIC: A simple  
449 and versatile tool for the insilico analysis of plant-nematode interactions. *Mol. Plant*  
450 *Pathol.*
- 451 Cabrera, J., Olmo, R., Ruiz-Ferrer, V., Abreu, I., Hermans, C., Martinez-Argudo, I., Fenoll,  
452 C., and Escobar, C. (2018). A Phenotyping Method of Giant Cells from Root-Knot  
453 Nematode Feeding Sites by Confocal Microscopy Highlights a Role for CHITINASE-  
454 LIKE 1 in Arabidopsis. *Int. J. Mol. Sci.* 19: 429.
- 455 Cai, Q., Qiao, L., Wang, M., He, B., Lin, F.-M., Palmquist, J., Huang, S.-D., and Jin, H.  
456 (2018). Plants send small RNAs in extracellular vesicles to fungal pathogen to silence  
457 virulence genes. *Science* (80-. ). 360: 1126–1129.
- 458 Caillaud, M.-C. and Favery, B. (2016). In Vivo Imaging of Microtubule Organization in  
459 Dividing Giant Cell. In *Methods in Molecular Biology*, pp. 137–144.
- 460 Caillaud, M.-C., Lecomte, P., Jammes, F., Quentin, M., Pagnotta, S., Andrio, E., de Almeida  
461 Engler, J., Marfaing, N., Gounon, P., Abad, P., and Favery, B. (2008). MAP65-3  
462 microtubule-associated protein is essential for nematode-induced giant cell ontogenesis  
463 in Arabidopsis. *Plant Cell* 20: 423–37.
- 464 Chávez Montes, R.A., De Fátima Rosas-Cárdenas, F., De Paoli, E., Accerbi, M., Rymarquis,  
465 L.A., Mahalingam, G., Marsch-Martínez, N., Meyers, B.C., Green, P.J., and De Folter, S.  
466 (2014). Sample sequencing of vascular plants demonstrates widespread conservation and

- 467 divergence of microRNAs. *Nat. Commun.* 5: 3722.
- 468 Curaba, J., Singh, M.B., and Bhalla, P.L. (2014). miRNAs in the crosstalk between  
469 phytohormone signalling pathways. *J. Exp. Bot.* 65: 1425–38.
- 470 Dai, X., Zhuang, Z., and Zhao, P.X. (2018). PsRNATarget: A plant small RNA target analysis  
471 server (2017 release). *Nucleic Acids Res.* 46: W49–W54.
- 472 Dunker, F., Trutzenberg, A., Rothenpieler, J.S., Kuhn, S., Pröls, R., Schreiber, T., Tissier, A.,  
473 Kemen, A., Kemen, E., Hückelhoven, R., and Weiberg, A. (2020). Oomycete small  
474 RNAs bind to the plant RNA-induced silencing complex for virulence. *Elife* 9.
- 475 Ediz, S.A. and Dickerson, O.J. (1976). Life cycle, pathogenicity, histopathology, and host  
476 range of race 5 of the barley root-knot nematode. *J. Nematol.* 8: 228–231.
- 477 Escobar, C., Barcala, M., Cabrera, J., and Fenoll, C. (2015). Overview of root-knot nematodes  
478 and giant cells. *Adv. Bot. Res.* 73: 1–32.
- 479 Escobar, C., Brown, S., and Mitchum, M.G. (2011). Transcriptomic and Proteomic Analysis  
480 of the Plant Response to Nematode Infection. In *Genomics and Molecular Genetics of*  
481 *Plant-Nematode Interactions* (Springer Netherlands: Dordrecht), pp. 157–173.
- 482 Favery, B., Dubreuil, G., acute raldine, Chen, M.S., Giron, D., and Abad, P. (2020a). Gall-  
483 Inducing Parasites: Convergent and Conserved Strategies of Plant Manipulation by  
484 Insects and Nematodes. *Annu. Rev. Phytopathol.* 58: 1–22.
- 485 Favery, B., Dubreuil, G., Chen, M.-S., Giron, D., and Abad, P. (2020b). Gall-Inducing  
486 Parasites: Convergent and Conserved Strategies of Plant Manipulation by Insects and  
487 Nematodes. *Annu. Rev. Phytopathol.* 58: 1–22.
- 488 Favery, B., Lecomte, P., Gil, N., Bechtold, N., Bouchez, D., Dalmasso, A., and Abad, P.  
489 (1998). RPE, a plant gene involved in early developmental steps of nematode feeding  
490 cells. *EMBO J.* 17: 6799–811.
- 491 Fu, Y., Mason, A.S., Zhang, Y., Lin, B., Xiao, M., Fu, D., and Yu, H. (2019). MicroRNA-  
492 mRNA expression profiles and their potential role in cadmium stress response in  
493 *Brassica napus*. *BMC Plant Biol.* 19: 570.
- 494 Griffiths-Jones, S., Saini, H.K., van Dongen, S., and Enright, A.J. (2007). miRBase: tools for  
495 microRNA genomics. *Nucleic Acids Res.* 36: D154–D158.
- 496 Hoang, N.T., Tóth, K., and Stacey, G. (2020). The role of microRNAs in the legume–  
497 *Rhizobium* nitrogen-fixing symbiosis. *J. Exp. Bot.* 71: 1668–1680.

- 498 Holbein, J., Franke, R.B., Marhavý, P., Fujita, S., Górecka, M., Sobczak, M., Geldner, N.,  
499 Schreiber, L., Grundler, F.M.W., and Siddique, S. (2019). Root endodermal barrier  
500 system contributes to defence against plant-parasitic cyst and root-knot nematodes. *Plant*  
501 *J.* 100: 221–236.
- 502 Jammes, F. et al. (2005). Genome-wide expression profiling of the host response to root-knot  
503 nematode infection in *Arabidopsis*. *Plant J.* 44: 447–458.
- 504 Jaubert-Possamai, S., Nouredine, Y., and Favery, B. (2019). MicroRNAs, New Players in  
505 the Plant–Nematode Interaction. *Front. Plant Sci.* 10: 1–8.
- 506 Jiang, A., Guo, Z., Pan, J., Yang, Y., Zhuang, Y., Zuo, D., Hao, C., Gao, Z., Xin, P., Chu, J.,  
507 Zhong, S., and Li, L. (2021). The PIF1-miR408-PLANTACYANIN repression cascade  
508 regulates light-dependent seed germination. *Plant Cell* 33: 1506–1529.
- 509 Kuo, Y.-W., Lin, J.-S., Li, Y.-C., Jhu, M.-Y., King, Y.-C., and Jeng, S.-T. (2019). MicroR408  
510 regulates defense response upon wounding in sweet potato. *J. Exp. Bot.* 70: 469–483.
- 511 Li, C. and Zhang, B. (2016). MicroRNAs in Control of Plant Development. *J. Cell. Physiol.*  
512 231: 303–313.
- 513 Lobna, H., Aymen, E.M., Hajer, R., Naima, M.-B., and Najet, H.-R. (2017). Biochemical and  
514 plant nutrient alterations induced by *Meloidogyne javanica* and *Fusarium oxysporum*  
515 *f.Sp.radicis lycopersici* co-infection on tomato cultivars with differing level of resistance  
516 to *M. javanica*. *Eur. J. Plant Pathol.* 148: 463–472.
- 517 Ma, C., Burd, S., and Lers, A. (2015). miR408 is involved in abiotic stress responses in  
518 *Arabidopsis*. *Plant J.* 84: 169–187.
- 519 Maunoury, N. and Vaucheret, H. (2011). AGO1 and AGO2 Act Redundantly in miR408-  
520 Mediated Plantacyanin Regulation. *PLoS One* 6: e28729.
- 521 Medina, C. et al. (2017). Characterization of microRNAs from *Arabidopsis* galls highlights a  
522 role for miR159 in the plant response to the root-knot nematode *Meloidogyne incognita*.  
523 *New Phytol.* 216: 882–896.
- 524 Rodiuc, N. et al. (2016). Evolutionarily distant pathogens require the *Arabidopsis*  
525 phytosulfokine signalling pathway to establish disease. *Plant. Cell Environ.* 39: 1396–  
526 1407.
- 527 Schulten, A., Bytomski, L., Quintana, J., Bernal, M., and Krämer, U. (2019). Do *Arabidopsis*  
528 *Squamosa* promoter binding Protein-Like genes act together in plant acclimation to

- 529 copper or zinc deficiency? *Plant Direct* 3: 590182.
- 530 Sommer, F., Kropat, J., Malasarn, D., Grosseohme, N.E., Chen, X., Giedroc, D.P., and  
531 Merchant, S.S. (2011). The CRR1 Nutritional Copper Sensor in *Chlamydomonas*  
532 Contains Two Distinct Metal-Responsive Domains. *Plant Cell* 22: 4098–4113.
- 533 Thatcher, S.R., Burd, S., Wright, C., Lers, A., and Green, P.J. (2015). Differential expression  
534 of miRNAs and their target genes in senescing leaves and siliques: Insights from deep  
535 sequencing of small RNAs and cleaved target RNAs. *Plant, Cell Environ.* 38: 188–200.
- 536 Weiberg, A. and Jin, H. (2015). Small RNAs—the secret agents in the plant–pathogen  
537 interactions. *Curr. Opin. Plant Biol.* 26: 87–94.
- 538 Weiberg, A., Wang, M., Lin, F.-M., Zhao, H., Zhang, Z., Kaloshian, I., Huang, H.-D., and Jin,  
539 H. (2013). Fungal Small RNAs Suppress Plant Immunity by Hijacking Host RNA  
540 Interference Pathways. *Science* (80-. ). 342: 118–123.
- 541 Wiggers, R.J.J., Starr, J.L.L., and Price, H.J.J. (1990). DNA content and variation in  
542 chromosome number in plant cells affected by *Meloidogyne incognita* and *M. arenaria*.  
543 *Phytopathology* 80: 1391–1395.
- 544 Xu, W., Meng, Y., and Wise, R.P. (2014). Mla- and Rom1-mediated control of microRNA398  
545 and chloroplast copper/zinc superoxide dismutase regulates cell death in response to the  
546 barley powdery mildew fungus. *New Phytol.* 201: 1396–1412.
- 547 Yamaguchi, Y.L. et al. (2017). Root-Knot and Cyst Nematodes Activate Procambium-  
548 Associated Genes in *Arabidopsis* Roots. *Front. Plant Sci.* 8: 1–13.
- 549 Yamasaki, H., Abdel-Ghany, S.E., Cohu, C.M., Kobayashi, Y., Shikanai, T., and Pilon, M.  
550 (2007). Regulation of copper homeostasis by micro-RNA in *Arabidopsis*. *J. Biol. Chem.*  
551 282: 16369–16378.
- 552 Yamasaki, H., Hayashi, M., Fukazawa, M., Kobayashi, Y., and Shikanai, T. (2009).  
553 SQUAMOSA promoter binding protein-like7 is a central regulator for copper  
554 homeostasis in *Arabidopsis*. *Plant Cell* 21: 347–361.
- 555 Zhang, H. and Li, L. (2013). SQUAMOSA promoter binding protein-like7 regulated  
556 microRNA408 is required for vegetative development in *Arabidopsis*. *Plant J.* 74: 98–  
557 109.
- 558 Zhang, H., Zhao, X., Li, J., Cai, H., Deng, X.W., and Li, L. (2014). MicroRNA408 is critical for  
559 the HY5-SPI7 gene network that mediates the coordinated response to light and copper.



560 Plant Cell 26: 4933–4953.

561 Zhang, J.-P., Yu, Y., Feng, Y.-Z., Zhou, Y.-F., Zhang, F., Yang, Y.-W., Lei, M.-Q., Zhang,  
562 Y.-C., and Chen, Y.-Q. (2017). MiR408 Regulates Grain Yield and Photosynthesis via a  
563 Phytocyanin Protein. *Plant Physiol.* 175: 1175–1185.

564 Zhao, J., Mejias, J., Quentin, M., Chen, Y., de Almeida-Engler, J., Mao, Z., Sun, Q., Liu, Q.,  
565 Xie, B., Abad, P., Favery, B., and Jian, H. (2020). The root-knot nematode effector  
566 MiPDI1 targets a stress-associated protein (SAP) to establish disease in Solanaceae and  
567 Arabidopsis. *New Phytol.* 228: 1417–1430.

568

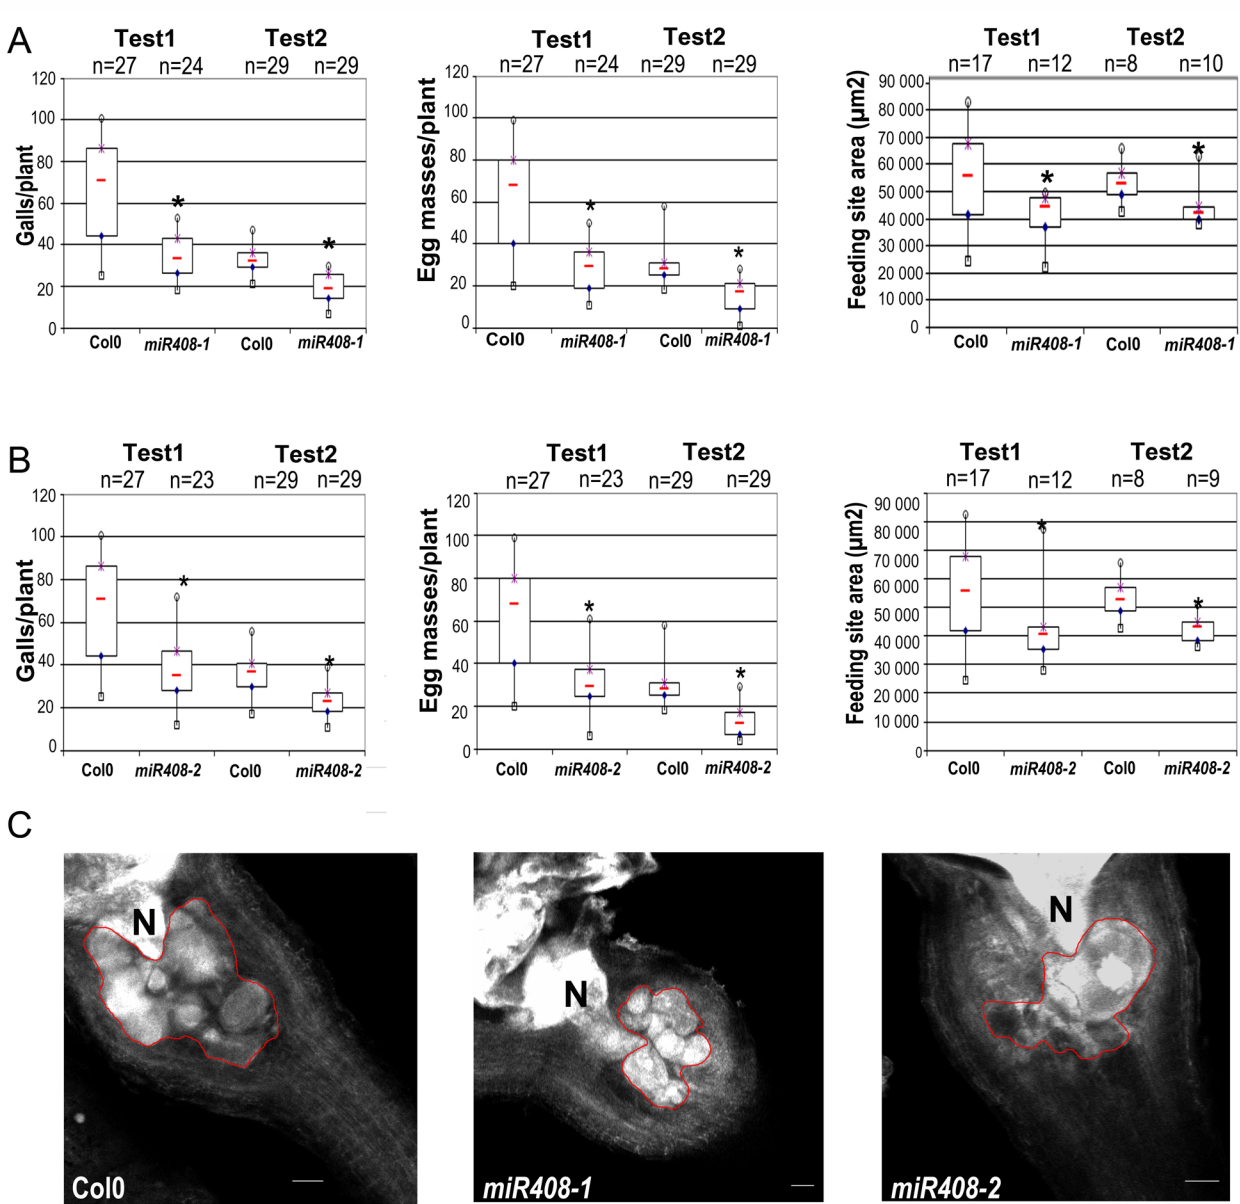

**Figure 1:** The miR408 KO lines were significantly less susceptible to *M. incognita* than the wild type. A-B, The susceptibility of the two miR408 KO lines, miR408-1 (A) & miR408-2 (B), and Col0 wild type to *M. incognita* was evaluated by counting the number of galls and egg masses per plant in two independent infection assays in soil. The effect of miR408 mutation on the development of giant feeding cells was further evaluated by measuring the size of the feeding site produced in each KO line and comparing it to that in Col0. Galls were collected seven weeks post in vitro infection to measure the area ( $\mu\text{m}^2$ ) covered by the giant cells by the BABB clearing method (Cabrera et al., 2018). The impact of plant genotype was analysed in Mann and Whitney tests. \*,  $P < 0.05$ . Open squares, minimum values; open circles, maximum values; red lines, median values; blue diamond, first quartile; purple star, third quartile. Bars 50 $\mu\text{m}$ .

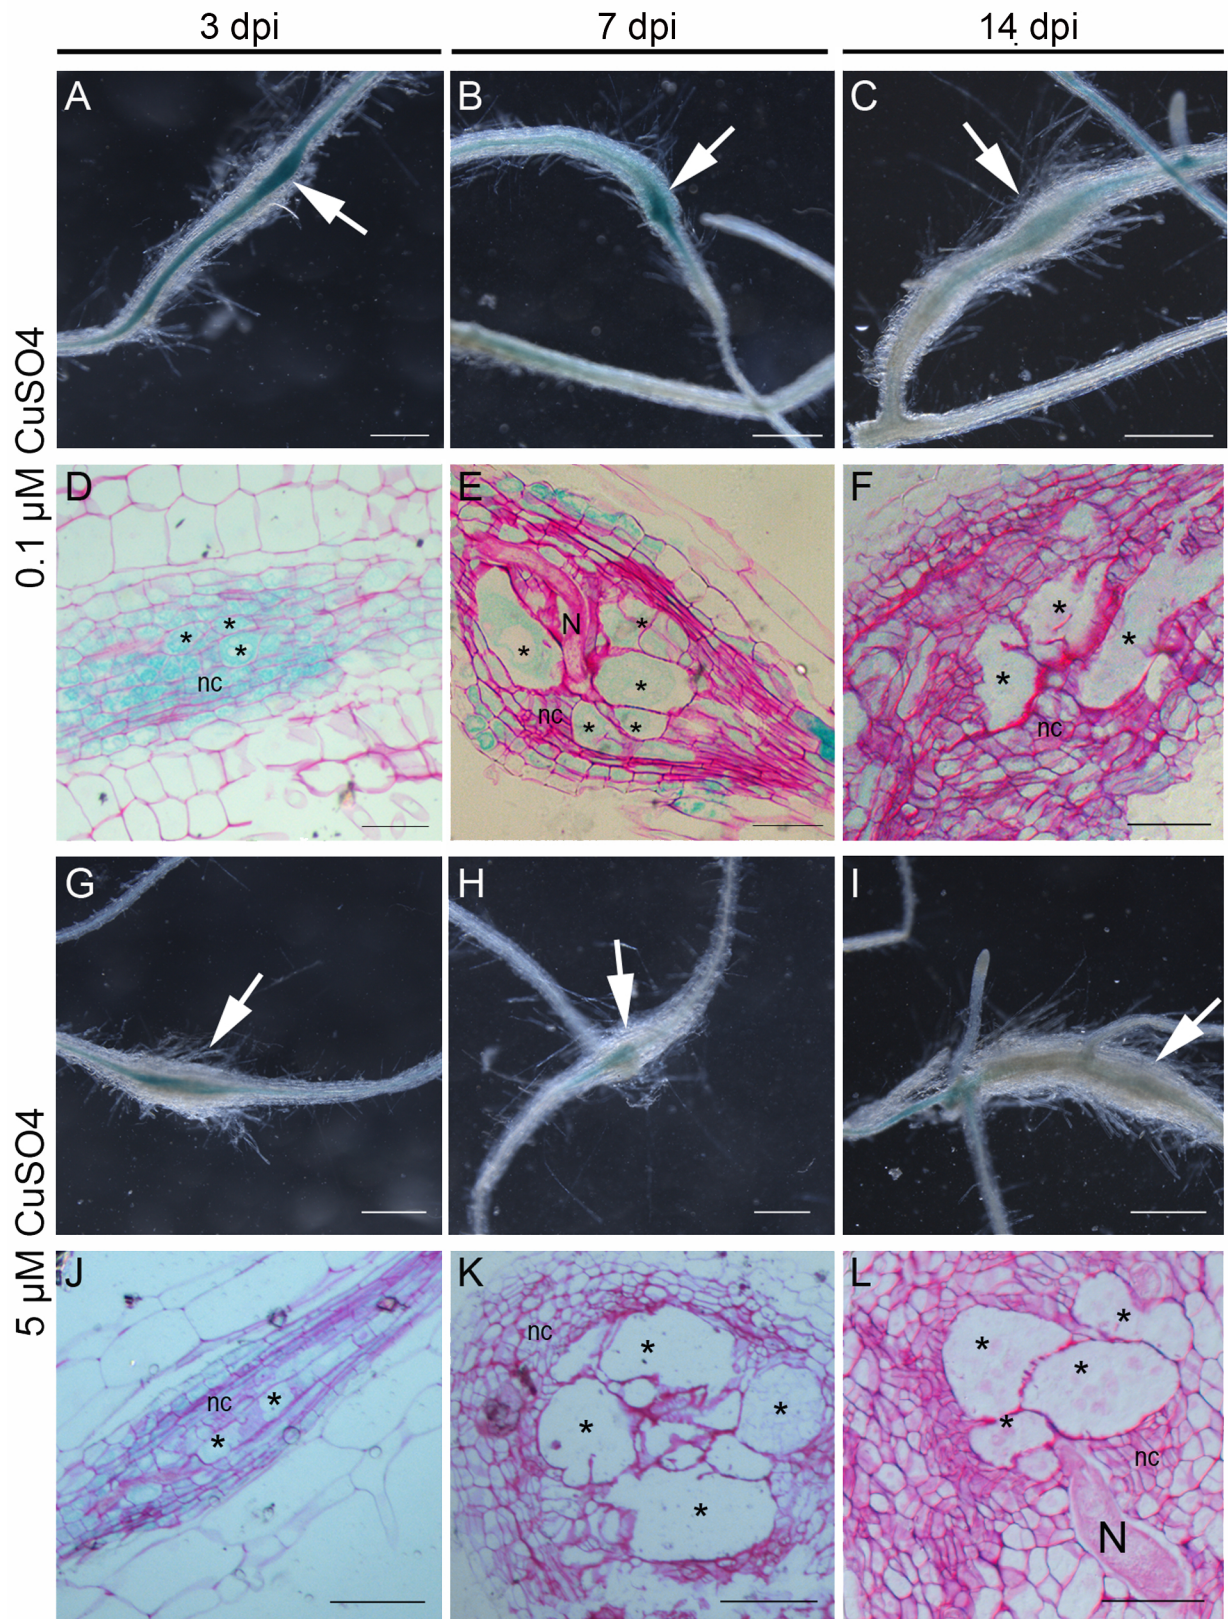

**Figure 2.** Copper modulates MIR408 promoter activity in galls. A-H, The activity of the MIR408 promoter was analysed in galls induced by *M. incognita* in *Arabidopsis* expressing the pMIR408::GUS construct grown in the presence of normal concentrations of copper ( $0.1 \mu\text{M CuSO}_4$ ) (A-F) or in the presence of high concentrations of copper ( $5.0 \mu\text{M CuSO}_4$ ) (G-L). A-C, a strong GUS signal was observed in galls 3 days post infection (dpi) (A), 7 dpi (B) and 14 dpi (C) in plants grown with  $0.1 \mu\text{M CuSO}_4$ . D-F, Section of gall at 3 dpi (D), 7dpi (E) and 14 dpi (F) showing the GUS signal in giant cells and in the cells surrounding the giant cells. G-I, a weaker GUS signal was observed in galls from plants grown with  $5.0 \mu\text{M CuSO}_4$  analysed at 3 dpi (G) and 7 dpi (H) and no GUS signal was observed in galls at 14 dpi (I). J-L, Section of gall at 3 dpi (J), 7dpi (K) and 14 dpi (L). Galls are indicated with an arrow; N, nematode; (\*) giant feeding cells; nc, neighbouring cells. Bars  $500 \mu\text{m}$  (A-C; G-I) or  $50 \mu\text{m}$  (D-F; J-L).



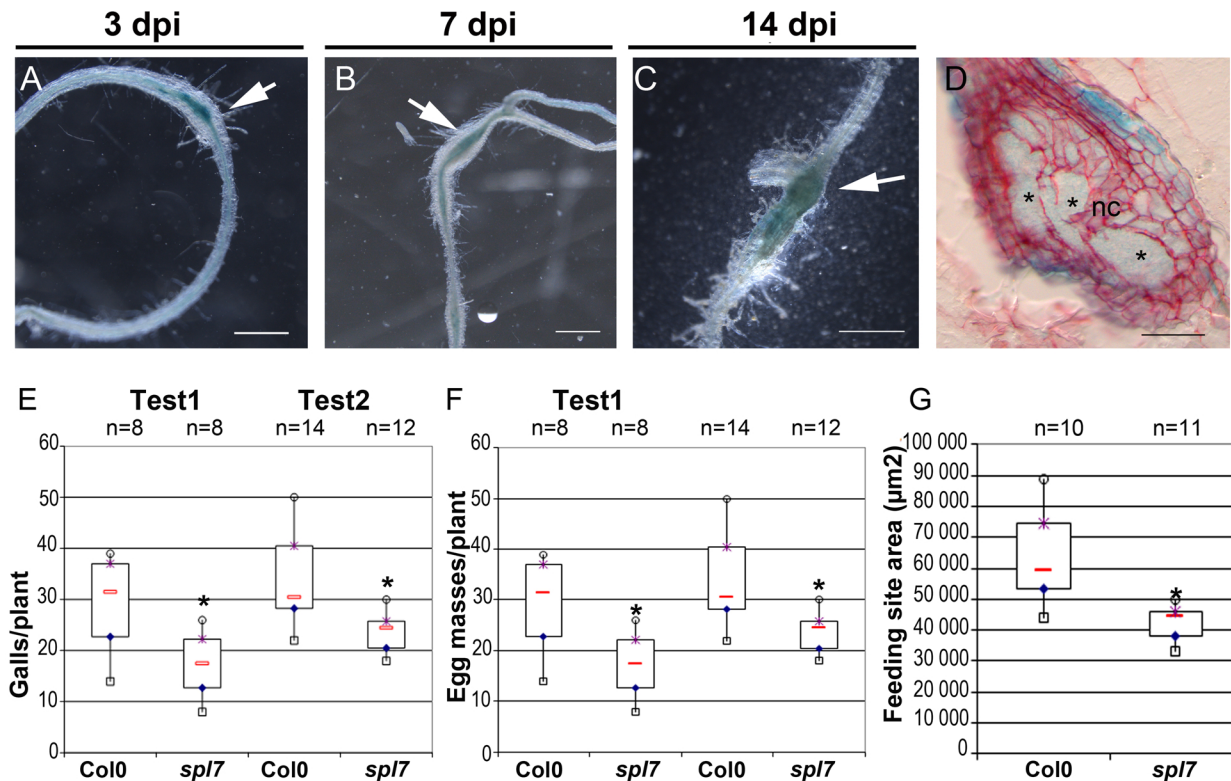

**Figure 3.** SPL7 is induced and required for *M. incognita* infection and giant cell formation in *Arabidopsis*. A-D, The activity of the SPL7 promoter (pSPL7) was studied in galls induced by *M. incognita* from *A. thaliana* expressing the pSPL7::GUS construct, at 3 days post inoculation (dpi)(A), 7 dpi (B) and 14 dpi (C). D, GUS activity was observed within 5.0 µm-thick gall sections at 7 dpi. E-G, the KO *spl7* line (SALK093849c) was infected with *M. incognita* J2. This line was significantly less susceptible to RKN than Col0, as shown by the smaller mean number of galls (E) and egg masses (F) per plant in two infection assays. (G), the effect of *spl7* mutation on the development of feeding cells was further evaluated by measuring the size of the feeding site produced. Galls were collected seven weeks post in vitro infection for measurement of the area (µm<sup>2</sup>) covered by the giant cells, by the BABB clearing method (Cabrera et al., 2018). Mann–Whitney tests were performed for statistical analysis in each experiment; significant differences relative to Col0: \*, P < 0.05; Open squares, minimum values; open circles, maximum values; red lines, median values; blue diamond, first quartile; purple star, third quartile. Galls are indicated with an arrow; (\*) giant feeding cells; nc, neighbouring cells. Bars 50 µm (A-C) or 500 µm (D).

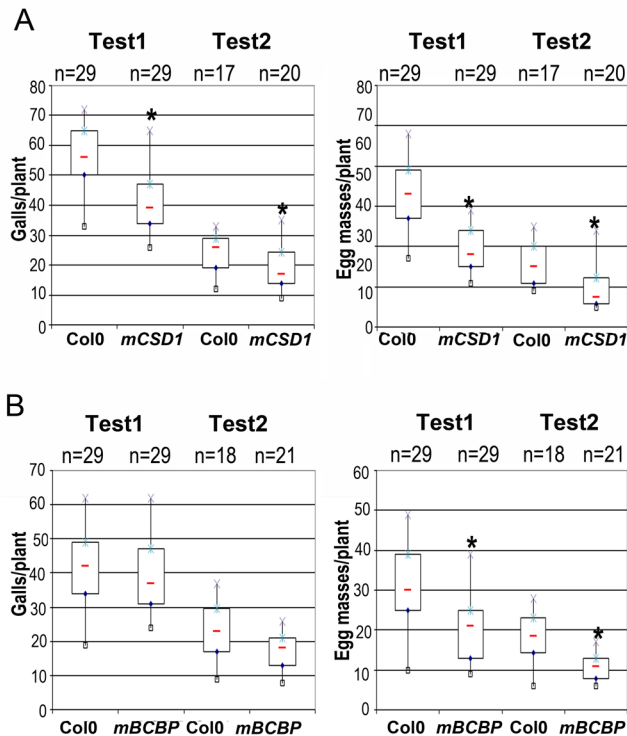

**Figure 4.** The miR398-resistant *mcsd1* and *mbcbp* mutant lines had smaller numbers of egg masses. The susceptibility of the *mcsd1* and *mbcbp* lines and of wild-type Col0 plants was evaluated by counting the number of galls and egg masses per plant in two independent infection assays in soil. The impact of the plant genotype on the number of galls and egg masses relative to Col0 was analysed in Mann and Whitney statistical tests. \*,  $P < 0.05$ . Open squares, minimum values; open circles, maximum values; red lines, median values; blue diamond, first quartile; purple star, third quartile.

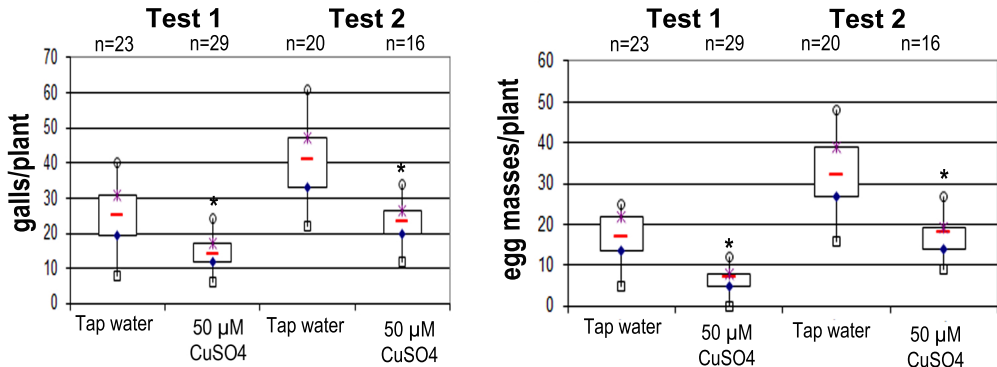

**Figure 5.** Plants watered with copper sulphate solution were significantly less susceptible to root knot nematodes. The effect of physiological concentrations of copper on *M. incognita* infection was evaluated by counting galls and egg masses in Col0 plants watered with a copper sulphate solution at a non-toxic concentration (50  $\mu$ M) and comparing the results to those for Col0 watered with tap water. The impact of plant genotype on the numbers of galls and egg masses relative to Col0 was analysed in Mann and Whitney statistical tests. \*,  $P < 0.05$ . Open squares, minimum values; open circles, maximum values; red lines, median values; blue diamond, first quartile; purple star, third quartile.

**Table 1. Expression profile of miRNAs of the miR408 and miR398 families in *Arabidopsis* and tomato galls.**

| miRNA family | miRNA name     | Plant species          | miRNA mature sequence | logFC G/R 7dpi | adj. pvalue | logFC G/R 14dpi | adj. pvalue |
|--------------|----------------|------------------------|-----------------------|----------------|-------------|-----------------|-------------|
| mir408       | SL3.0ch01_346  | <i>S. lycopersicum</i> | TGCACAGCCTCTTCCCTGGCT | 3,741          | 0,000       | 3,289           | 0,017       |
|              | SL3.0ch01_419  | <i>S. lycopersicum</i> | TGCACTGCCTCTTCCCTGGCT | 1,287          | 0,029       | 3,133           | 0,033       |
|              | Ath-miR408     | <i>A. thaliana</i>     | ATGCACTGCCTCTTCCCTGGC | 2,042          | 0,042       | 2,411           | 0,001       |
| mir398       | SL3.0ch12_14_3 | <i>S. lycopersicum</i> | ATGTGTTCTCAGGTTACCCCT | 3,272          | 0,009       | 2,166           | 0,066       |
|              | SL3.0ch05_225  | <i>S. lycopersicum</i> | TTGTGTTCTCAGGTCACCCCT | 0,290          | 0,863       | 3,430           | 0,015       |
|              | SL3.0ch11_437  | <i>S. lycopersicum</i> | TATGTTCTCAGGTCGCCCCTG | 2,144          | 0,112       | 1,759           | 0,067       |
|              | ath-miR398b-c  | <i>A. thaliana</i>     | TGTGTTCTCAGGTCACCCCTT | 2,464          | 0,119       | 3,287           | 0,000       |



## Parsed Citations

Abad, P. and Williamson, V.M. (2010). Plant Nematode Interaction: A Sophisticated Dialogue. *Adv. Bot. Res.* 53: 147–192.

Google Scholar: [Author Only Title Only Author and Title](#)

de Almeida Engler, J. and Gheysen, G. (2013). Nematode-induced endoreduplication in plant host cells: why and how? *Mol. Plant-Microbe Interact.* 26: 17–24.

Google Scholar: [Author Only Title Only Author and Title](#)

Araki, R., Mermoud, M., Yamasaki, H., Kamiya, T., Fujiwara, T., and Shikanai, T. (2018). SPL7 locally regulates copper-homeostasis-related genes in *Arabidopsis*. *J. Plant Physiol.* 224–225: 137–143.

Google Scholar: [Author Only Title Only Author and Title](#)

Axtell, M.J. (2013). Classification and Comparison of Small RNAs from Plants. *Annu. Rev. Plant Biol.* 64: 137–159.

Google Scholar: [Author Only Title Only Author and Title](#)

Barciszewska-Pacak, M., Milanowska, K., Knop, K., Bielewicz, D., Nuc, P., Plewka, P., Pacak, A.M., Vazquez, F., Karlowski, W., Jarmolowski, A., and Szweykowska-Kulinska, Z. (2015). *Arabidopsis* microRNA expression regulation in a wide range of abiotic stress responses. *Front. Plant Sci.* 6: 410.

Google Scholar: [Author Only Title Only Author and Title](#)

Beauchair, L., Yu, A., and Bouché, N. (2010). MicroRNA-directed cleavage and translational repression of the copper chaperone for superoxide dismutase mRNA in *Arabidopsis*. *Plant J.* 62: 454–462.

Google Scholar: [Author Only Title Only Author and Title](#)

Bernal, M., Casero, D., Singh, V., Wilson, G.T., Grande, A., Yang, H., Dodani, S.C., Pellegrini, M., Huijser, P., Connolly, E.L., Merchant, S.S., and Krämer, U. (2012). Transcriptome sequencing identifies SPL7-regulated copper acquisition genes FRO4/FRO5 and the copper dependence of iron homeostasis in *Arabidopsis*. *Plant Cell* 24: 738–761.

Google Scholar: [Author Only Title Only Author and Title](#)

Blok, V.C., Jones, J.T., Phillips, M.S., and Trudgill, D.L. (2008). Parasitism genes and host range disparities in biotrophic nematodes: the conundrum of polyphagy versus specialisation. *BioEssays* 30: 249–259.

Google Scholar: [Author Only Title Only Author and Title](#)

Brousse, C., Liu, Q., Beauchair, L., Deremetz, A., Axtell, M.J., and Bouché, N. (2014). A non-canonical plant microRNA target site. *Nucleic Acids Res.* 42: 5270–5279.

Google Scholar: [Author Only Title Only Author and Title](#)

Burkhead, J.L., Gogolin Reynolds, K.A., Abdel-Ghany, S.E., Cohu, C.M., and Pilon, M. (2009). Copper homeostasis. *New Phytol.* 182: 799–816.

Google Scholar: [Author Only Title Only Author and Title](#)

Cabrera, J., Bustos, R., Favery, B., Fenoll, C., and Escobar, C. (2014). NEMATIC: A simple and versatile tool for the insilico analysis of plant-nematode interactions. *Mol. Plant Pathol.*

Google Scholar: [Author Only Title Only Author and Title](#)

Cabrera, J., Olmo, R., Ruiz-Ferrer, V., Abreu, I., Hermans, C., Martinez-Argudo, I., Fenoll, C., and Escobar, C. (2018). A Phenotyping Method of Giant Cells from Root-Knot Nematode Feeding Sites by Confocal Microscopy Highlights a Role for CHITINASE-LIKE 1 in *Arabidopsis*. *Int. J. Mol. Sci.* 19: 429.

Google Scholar: [Author Only Title Only Author and Title](#)

Cai, Q., Qiao, L., Wang, M., He, B., Lin, F.-M., Palmquist, J., Huang, S.-D., and Jin, H. (2018). Plants send small RNAs in extracellular vesicles to fungal pathogen to silence virulence genes. *Science* (80-. ). 360: 1126–1129.

Google Scholar: [Author Only Title Only Author and Title](#)

Caillaud, M.-C. and Favery, B. (2016). In Vivo Imaging of Microtubule Organization in Dividing Giant Cell. In *Methods in Molecular Biology*, pp. 137–144.

Google Scholar: [Author Only Title Only Author and Title](#)

Caillaud, M.-C., Lecomte, P., Jammes, F., Quentin, M., Pagnotta, S., Andrio, E., de Almeida Engler, J., Marfaing, N., Gounon, P., Abad, P., and Favery, B. (2008). MAP65-3 microtubule-associated protein is essential for nematode-induced giant cell ontogenesis in *Arabidopsis*. *Plant Cell* 20: 423–37.

Google Scholar: [Author Only Title Only Author and Title](#)

Chávez Montes, R.A., De Fátima Rosas-Cárdenas, F., De Paoli, E., Accerbi, M., Rymarquis, L.A., Mahalingam, G., Marsch-Martínez, N., Meyers, B.C., Green, P.J., and De Folter, S. (2014). Sample sequencing of vascular plants demonstrates widespread conservation and divergence of microRNAs. *Nat. Commun.* 5: 3722.

Google Scholar: [Author Only Title Only Author and Title](#)

Curaba, J., Singh, M.B., and Bhalla, P.L. (2014). miRNAs in the crosstalk between phytohormone signalling pathways. *J. Exp. Bot.* 65: 1425–38.

Google Scholar: [Author Only Title Only Author and Title](#)

Dai, X., Zhuang, Z., and Zhao, P.X. (2018). PsRNATarget: A plant small RNA target analysis server (2017 release). *Nucleic Acids Res.* 46: W49–W54.

Google Scholar: [Author Only Title Only Author and Title](#)

Dunker, F., Trutzenberg, A., Rothenpieler, J.S., Kuhn, S., Pröls, R., Schreiber, T., Tissier, A., Kemen, A., Kemen, E., Hückelhoven, R., and Weiberg, A. (2020). Oomycete small RNAs bind to the plant RNA-induced silencing complex for virulence. *Elife* 9.

Google Scholar: [Author Only Title Only Author and Title](#)

Ediz, S.A and Dickerson, O.J. (1976). Life cycle, pathogenicity, histopathology, and host range of race 5 of the barley root-knot nematode. *J. Nematol.* 8: 228–231.

Google Scholar: [Author Only Title Only Author and Title](#)

Escobar, C., Barcala, M., Cabrera, J., and Fenoll, C. (2015). Overview of root-knot nematodes and giant cells. *Adv. Bot. Res.* 73: 1–32.

Google Scholar: [Author Only Title Only Author and Title](#)

Escobar, C., Brown, S., and Mitchum, M.G. (2011). Transcriptomic and Proteomic Analysis of the Plant Response to Nematode Infection. In *Genomics and Molecular Genetics of Plant-Nematode Interactions* (Springer Netherlands: Dordrecht), pp. 157–173.

Google Scholar: [Author Only Title Only Author and Title](#)

Favery, B., Dubreuil, G. acute raldine, Chen, M.S., Giron, D., and Abad, P. (2020a). Gall-Inducing Parasites: Convergent and Conserved Strategies of Plant Manipulation by Insects and Nematodes. *Annu. Rev. Phytopathol.* 58: 1–22.

Google Scholar: [Author Only Title Only Author and Title](#)

Favery, B., Dubreuil, G., Chen, M.-S., Giron, D., and Abad, P. (2020b). Gall-Inducing Parasites: Convergent and Conserved Strategies of Plant Manipulation by Insects and Nematodes. *Annu. Rev. Phytopathol.* 58: 1–22.

Google Scholar: [Author Only Title Only Author and Title](#)

Favery, B., Lecomte, P., Gil, N., Bechtold, N., Bouchez, D., Dalmasso, A., and Abad, P. (1998). RPE, a plant gene involved in early developmental steps of nematode feeding cells. *EMBO J.* 17: 6799–811.

Google Scholar: [Author Only Title Only Author and Title](#)

Fu, Y., Mason, A.S., Zhang, Y., Lin, B., Xiao, M., Fu, D., and Yu, H. (2019). MicroRNA-mRNA expression profiles and their potential role in cadmium stress response in *Brassica napus*. *BMC Plant Biol.* 19: 570.

Google Scholar: [Author Only Title Only Author and Title](#)

Griffiths-Jones, S., Saini, H.K., van Dongen, S., and Enright, A.J. (2007). miRBase: tools for microRNA genomics. *Nucleic Acids Res.* 36: D154–D158.

Google Scholar: [Author Only Title Only Author and Title](#)

Hoang, N.T., Tóth, K., and Stacey, G. (2020). The role of microRNAs in the legume–Rhizobium nitrogen-fixing symbiosis. *J. Exp. Bot.* 71: 1668–1680.

Google Scholar: [Author Only Title Only Author and Title](#)

Holbein, J., Franke, R.B., Marhavý, P., Fujita, S., Górecka, M., Sobczak, M., Geldner, N., Schreiber, L., Grundler, F.M.W., and Siddique, S. (2019). Root endodermal barrier system contributes to defence against plant-parasitic cyst and root-knot nematodes. *Plant J.* 100: 221–236.

Google Scholar: [Author Only Title Only Author and Title](#)

Jammes, F. et al. (2005). Genome-wide expression profiling of the host response to root-knot nematode infection in *Arabidopsis*. *Plant J.* 44: 447–458.

Google Scholar: [Author Only Title Only Author and Title](#)

Jaubert-Possamai, S., Nouredine, Y., and Favery, B. (2019). MicroRNAs, New Players in the Plant–Nematode Interaction. *Front. Plant Sci.* 10: 1–8.

Google Scholar: [Author Only Title Only Author and Title](#)

Jiang, A, Guo, Z, Pan, J., Yang, Y., Zhuang, Y., Zuo, D., Hao, C., Gao, Z., Xin, P., Chu, J., Zhong, S., and Li, L. (2021). The PIF1-miR408-PLANTACYANIN repression cascade regulates light-dependent seed germination. *Plant Cell* 33: 1506–1529.

Google Scholar: [Author Only Title Only Author and Title](#)

Kuo, Y.-W., Lin, J.-S., Li, Y.-C., Jhu, M.-Y., King, Y.-C., and Jeng, S.-T. (2019). MicroR408 regulates defense response upon wounding in sweet potato. *J. Exp. Bot.* 70: 469–483.

Google Scholar: [Author Only Title Only Author and Title](#)

Li, C. and Zhang, B. (2016). MicroRNAs in Control of Plant Development. *J. Cell. Physiol.* 231: 303–313.

Google Scholar: [Author Only Title Only Author and Title](#)

Lobna, H., Aymen, E.M., Hajer, R., Naima, M.-B., and Najet, H.-R. (2017). Biochemical and plant nutrient alterations induced by *Meloidogyne javanica* and *Fusarium oxysporum* f.sp.radicis lycopersici co-infection on tomato cultivars with differing level of resistance to *M. javanica*. *Eur. J. Plant Pathol.* 148: 463–472.

Google Scholar: [Author Only Title Only Author and Title](#)

Ma, C., Burd, S., and Lers, A (2015). miR408 is involved in abiotic stress responses in *Arabidopsis*. *Plant J.* 84: 169–187.

Google Scholar: [Author Only Title Only Author and Title](#)

- Maunoury, N. and Vaucheret, H. (2011).** AGO1 and AGO2 Act Redundantly in miR408-Mediated Plantacyanin Regulation. *PLoS One* 6: e28729.  
Google Scholar: [Author Only](#) [Title Only](#) [Author and Title](#)
- Medina, C. et al. (2017).** Characterization of microRNAs from Arabidopsis galls highlights a role for miR159 in the plant response to the root-knot nematode *Meloidogyne incognita*. *New Phytol.* 216: 882–896.  
Google Scholar: [Author Only](#) [Title Only](#) [Author and Title](#)
- Rodiuc, N. et al. (2016).** Evolutionarily distant pathogens require the Arabidopsis phytoalexin signalling pathway to establish disease. *Plant. Cell Environ.* 39: 1396–1407.  
Google Scholar: [Author Only](#) [Title Only](#) [Author and Title](#)
- Schulten, A., Bytomski, L., Quintana, J., Bernal, M., and Krämer, U. (2019).** Do Arabidopsis Squamosa promoter binding Protein-Like genes act together in plant acclimation to copper or zinc deficiency? *Plant Direct* 3: 590182.  
Google Scholar: [Author Only](#) [Title Only](#) [Author and Title](#)
- Sommer, F., Kropat, J., Malasarn, D., Grosseheime, N.E., Chen, X., Giedroc, D.P., and Merchant, S.S. (2011).** The CRR1 Nutritional Copper Sensor in *Chlamydomonas* Contains Two Distinct Metal-Responsive Domains. *Plant Cell* 22: 4098–4113.  
Google Scholar: [Author Only](#) [Title Only](#) [Author and Title](#)
- Thatcher, S.R., Burd, S., Wright, C., Lers, A., and Green, P.J. (2015).** Differential expression of miRNAs and their target genes in senescing leaves and siliques: Insights from deep sequencing of small RNAs and cleaved target RNAs. *Plant, Cell Environ.* 38: 188–200.  
Google Scholar: [Author Only](#) [Title Only](#) [Author and Title](#)
- Weiberg, A. and Jin, H. (2015).** Small RNAs—the secret agents in the plant–pathogen interactions. *Curr. Opin. Plant Biol.* 26: 87–94.  
Google Scholar: [Author Only](#) [Title Only](#) [Author and Title](#)
- Weiberg, A., Wang, M., Lin, F.-M., Zhao, H., Zhang, Z., Kaloshian, I., Huang, H.-D., and Jin, H. (2013).** Fungal Small RNAs Suppress Plant Immunity by Hijacking Host RNA Interference Pathways. *Science* (80-. ). 342: 118–123.  
Google Scholar: [Author Only](#) [Title Only](#) [Author and Title](#)
- Wiggers, R.J.J., Starr, J.L.L., and Price, H.J.J. (1990).** DNA content and variation in chromosome number in plant cells affected by *Meloidogyne incognita* and *M. arenaria*. *Phytopathology* 80: 1391–1395.  
Google Scholar: [Author Only](#) [Title Only](#) [Author and Title](#)
- Xu, W., Meng, Y., and Wise, R.P. (2014).** Mla- and Rom1-mediated control of microRNA398 and chloroplast copper/zinc superoxide dismutase regulates cell death in response to the barley powdery mildew fungus. *New Phytol.* 201: 1396–1412.  
Google Scholar: [Author Only](#) [Title Only](#) [Author and Title](#)
- Yamaguchi, Y.L. et al. (2017).** Root-Knot and Cyst Nematodes Activate Procambium-Associated Genes in Arabidopsis Roots. *Front. Plant Sci.* 8: 1–13.  
Google Scholar: [Author Only](#) [Title Only](#) [Author and Title](#)
- Yamasaki, H., Abdel-Ghany, S.E., Cohu, C.M., Kobayashi, Y., Shikanai, T., and Pilon, M. (2007).** Regulation of copper homeostasis by micro-RNA in Arabidopsis. *J. Biol. Chem.* 282: 16369–16378.  
Google Scholar: [Author Only](#) [Title Only](#) [Author and Title](#)
- Yamasaki, H., Hayashi, M., Fukazawa, M., Kobayashi, Y., and Shikanai, T. (2009).** SQUAMOSA promoter binding protein-like7 is a central regulator for copper homeostasis in Arabidopsis. *Plant Cell* 21: 347–361.  
Google Scholar: [Author Only](#) [Title Only](#) [Author and Title](#)
- Zhang, H. and Li, L. (2013).** SQUAMOSA promoter binding protein-like7 regulated microRNA408 is required for vegetative development in Arabidopsis. *Plant J.* 74: 98–109.  
Google Scholar: [Author Only](#) [Title Only](#) [Author and Title](#)
- Zhang, H., Zhao, X., Li, J., Cai, H., Deng, X.W., and Li, L. (2014).** MicroRNA408 is critical for the HY5-SPI7 gene network that mediates the coordinated response to light and copper. *Plant Cell* 26: 4933–4953.  
Google Scholar: [Author Only](#) [Title Only](#) [Author and Title](#)
- Zhang, J.-P., Yu, Y., Feng, Y.-Z., Zhou, Y.-F., Zhang, F., Yang, Y.-W., Lei, M.-Q., Zhang, Y.-C., and Chen, Y.-Q. (2017).** MiR408 Regulates Grain Yield and Photosynthesis via a Phytoalexin Protein. *Plant Physiol.* 175: 1175–1185.  
Google Scholar: [Author Only](#) [Title Only](#) [Author and Title](#)
- Zhao, J., Mejias, J., Quentin, M., Chen, Y., de Almeida-Engler, J., Mao, Z., Sun, Q., Liu, Q., Xie, B., Abad, P., Favory, B., and Jian, H. (2020).** The root-knot nematode effector MiPDI1 targets a stress-associated protein (SAP) to establish disease in Solanaceae and Arabidopsis. *New Phytol.* 228: 1417–1430.  
Google Scholar: [Author Only](#) [Title Only](#) [Author and Title](#)
